# Supplementary material
Source: ML conference proceedings conference paper supplement (https://openreview.net/forum?id=X8Mhumi52G)
Supplement: supplementary_material [file attachment]

# Env Parameters

- Number of players=8
- Werewolves=2
- Villagers=6
- Signal lenght = 2
- Signal range= 2 (boolean)

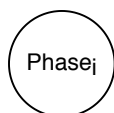

Comments

Each observation is a dictionary passed to every playing agent

| Observations |                           |
|--------------|---------------------------|
| Key          | Val                       |
| Day          | 0                         |
| Status map   | [1,1,1,1,1,1,1,1]         |
| Phase        | 0                         |
| Targets      | [-1,-1,-1,-1,-1,-1,-1,-1] |
| Signals      | Matrix                    |
| Own id       | Agent id                  |

In this example signals are

| Actions |        |          |
|---------|--------|----------|
| ID      | Target | Signal 1 |
| 0       | -1     | -1       |
| 1       | -1     | -1       |
| 2       | -1     | -1       |
| 3       | -1     | -1       |
| 4       | -1     | -1       |
| 5       | -1     | -1       |
| 6       | -1     | -1       |
| 7       | -1     | -1       |

## Villagers

## Envrionment

## W

Reset

At the start of the episode both targets and signals are -1

| Observations |                           |
|--------------|---------------------------|
| Key          | Val                       |
| Day          | 0                         |
| Status map   | [1,1,1,1,1,1,1,1]         |
| Phase        | 0                         |
| Targets      | [-1,-1,-1,-1,-1,-1,-1,-1] |
| Signals      | -1 Matrix                 |
| Own id       | Agent id                  |

P<sub>0</sub>

Observation are passed only to wolves in this phase

The targets/signals are updated just for the wolves.

The phase has increased

| Observations |                         |
|--------------|-------------------------|
| Key          | Val                     |
| Day          | 0                       |
| Status map   | [1,1,1,1,1,1,1,1]       |
| Phase        | 1                       |
| Targets      | [3,2,-1,-1,-1,-1,-1,-1] |
| Signals      | Updated Matrix          |
| Own id       | Agent id                |

P<sub>1</sub>

Notice how the targets/signals of the villagers are not updated. The only updated param is the status map

| Observations |     |
|--------------|-----|
| Key          | Val |
| Day          | 0   |

| Observations |     |
|--------------|-----|
| Key          | Val |
| Day          | 0   |

Agent  
stat

boolean

| Signal 2 |    |
|----------|----|
|          | -1 |
|          | -1 |
|          | -1 |
|          | -1 |
|          | -1 |
|          | -1 |
|          | -1 |
|          | -1 |
|          | -1 |

## ereWolves

| Actions |     |    |    |
|---------|-----|----|----|
| ID      | Trg | S1 | S2 |
| 0       | 3   | 0  | 1  |
| 1       | 2   | 1  | 1  |

In this example the signals are random, while the targets are man made

| Actions |     |    |    |
|---------|-----|----|----|
| ID      | Trg | S1 | S2 |
| 0       | 3   | 1  | 1  |
| 1       | 3   | 1  | 0  |

3 has been eaten, its us will become zero

Agent 3 will be  
penalized for dying,  
but its action will not  
be passed to the env

Agent 5 will be  
penalized for dying  
even though it is not

|            |                           |
|------------|---------------------------|
| Status map | [1,1,0,1,1,1,1,1]         |
| Phase      | 2                         |
| Targets    | [-1,-1,-1,-1,-1,-1,-1,-1] |
| Signals    | -1 Matrix                 |
| Own id     | Agent id                  |

|            |                         |
|------------|-------------------------|
| Status map | [1,1,0,1,1,1,1,1]       |
| Phase      | 2                       |
| Targets    | [3,3,-1,-1,-1,-1,-1,-1] |
| Signals    | Updated Matrix          |
| Own id     | Agent id                |

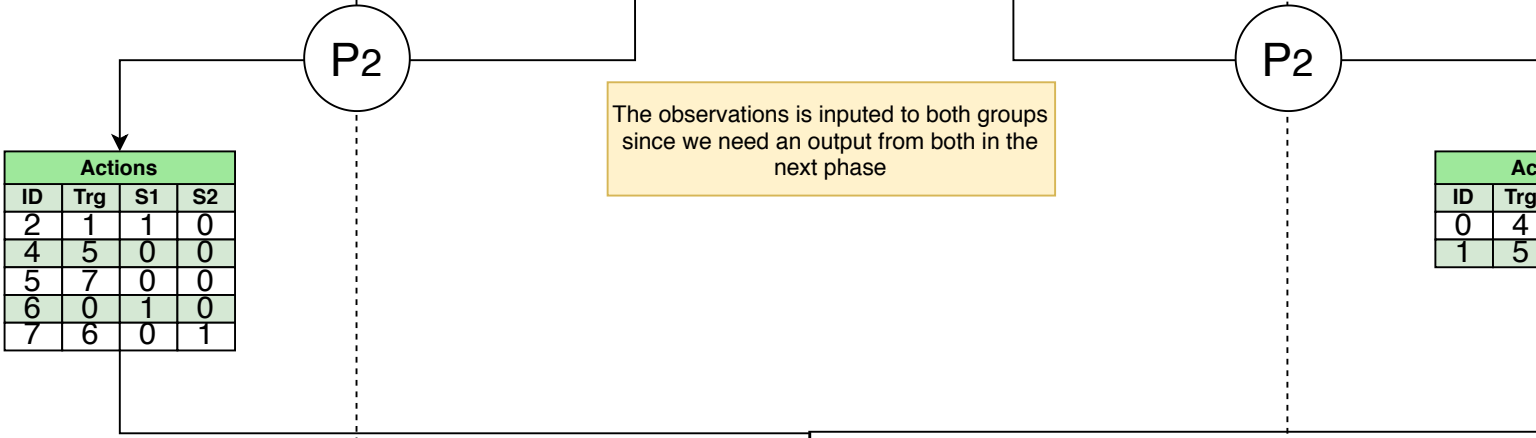

| Actions |     |    |    |
|---------|-----|----|----|
| ID      | Trg | S1 | S2 |
| 2       | 1   | 1  | 0  |
| 4       | 5   | 0  | 0  |
| 5       | 7   | 0  | 0  |
| 6       | 0   | 1  | 0  |
| 7       | 6   | 0  | 1  |

| Ac |     |
|----|-----|
| ID | Trg |
| 0  | 4   |
| 1  | 5   |

| Observations |                    |
|--------------|--------------------|
| Key          | Val                |
| Day          | 0                  |
| Status map   | [1,1,0,1,1,1,1,1]  |
| Phase        | 3                  |
| Targets      | [4,5,1,-1,5,7,0,6] |
| Signals      | Updated Matrix     |
| Own id       | Agent id           |

| Actions |     |    |    |
|---------|-----|----|----|
| ID      | Trg | S1 | S2 |
| 2       | 3   | 1  | 1  |
| 4       | 5   | 0  | 0  |
| 5       | 7   | 1  | 0  |
| 6       | 5   | 0  | 1  |
| 7       | 6   | 0  | 0  |

| Ac |     |
|----|-----|
| ID | Trg |
| 0  | 5   |
| 1  | 5   |

| Observations |                    |
|--------------|--------------------|
| Key          | Val                |
| Day          | 1                  |
| Status map   | [1,1,0,1,1,0,1,1]  |
| Phase        | 0                  |
| Targets      | [5,5,3,-1,5,7,5,6] |
| Signals      | Updated Matrix     |
| Own id       | Agent id           |

| Actions |     |    |    |
|---------|-----|----|----|
| ID      | Trg | S1 | S2 |
| 2       | /   | /  | /  |
| 4       | /   | /  | /  |
| 5       | /   | /  | /  |

| Ac |     |
|----|-----|
| ID | Trg |
| 0  | 2   |
| 1  | 6   |





|   |   |   |   |
|---|---|---|---|
| 6 | / | / | / |
| 7 | / | / | / |

No input from the villagers is needed anymore

| Observations |                                |
|--------------|--------------------------------|
| Key          | Val                            |
| Day          | 1                              |
| Status map   | [1, 1, 0, 1, 1, 0, 1, 1]       |
| Phase        | 1                              |
| Targets      | [2, 6, -1, -1, -1, -1, -1, -1] |
| Signals      | Updated Matrix                 |
| Own id       | Agent id                       |

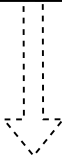

Repeat for phase 1
