# Supplementary material
Source: ML conference proceedings conference paper supplement (https://openreview.net/forum?id=X8Mhumi52G)

Initialization:  
- shuffle maps -> random  
- is\_night -> False  
- is\_com -> True  
- is\_dance -> False

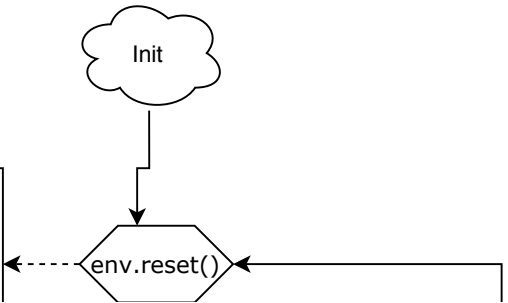

Legend

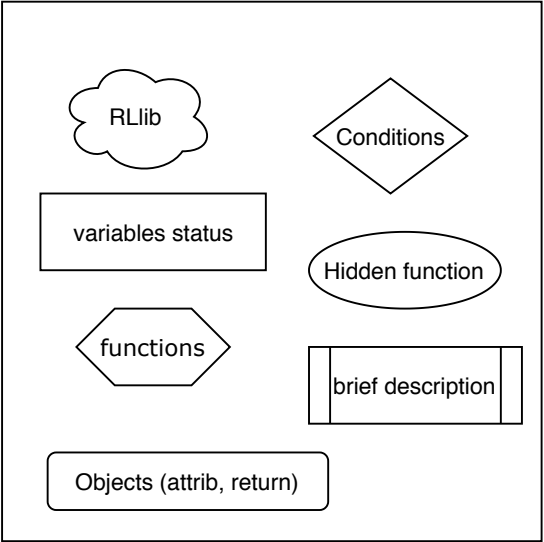

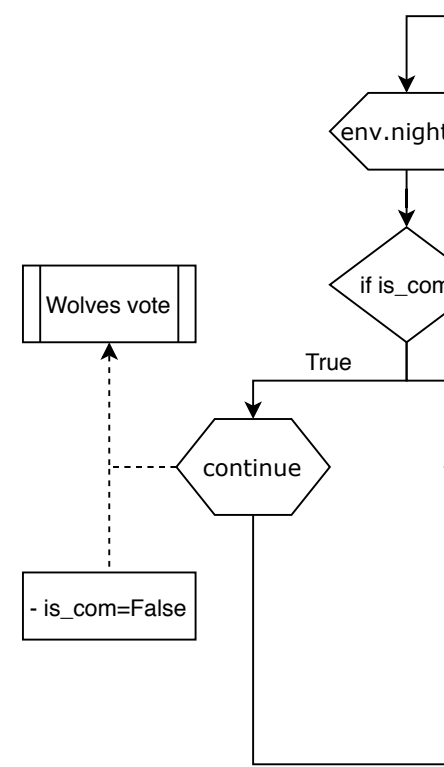

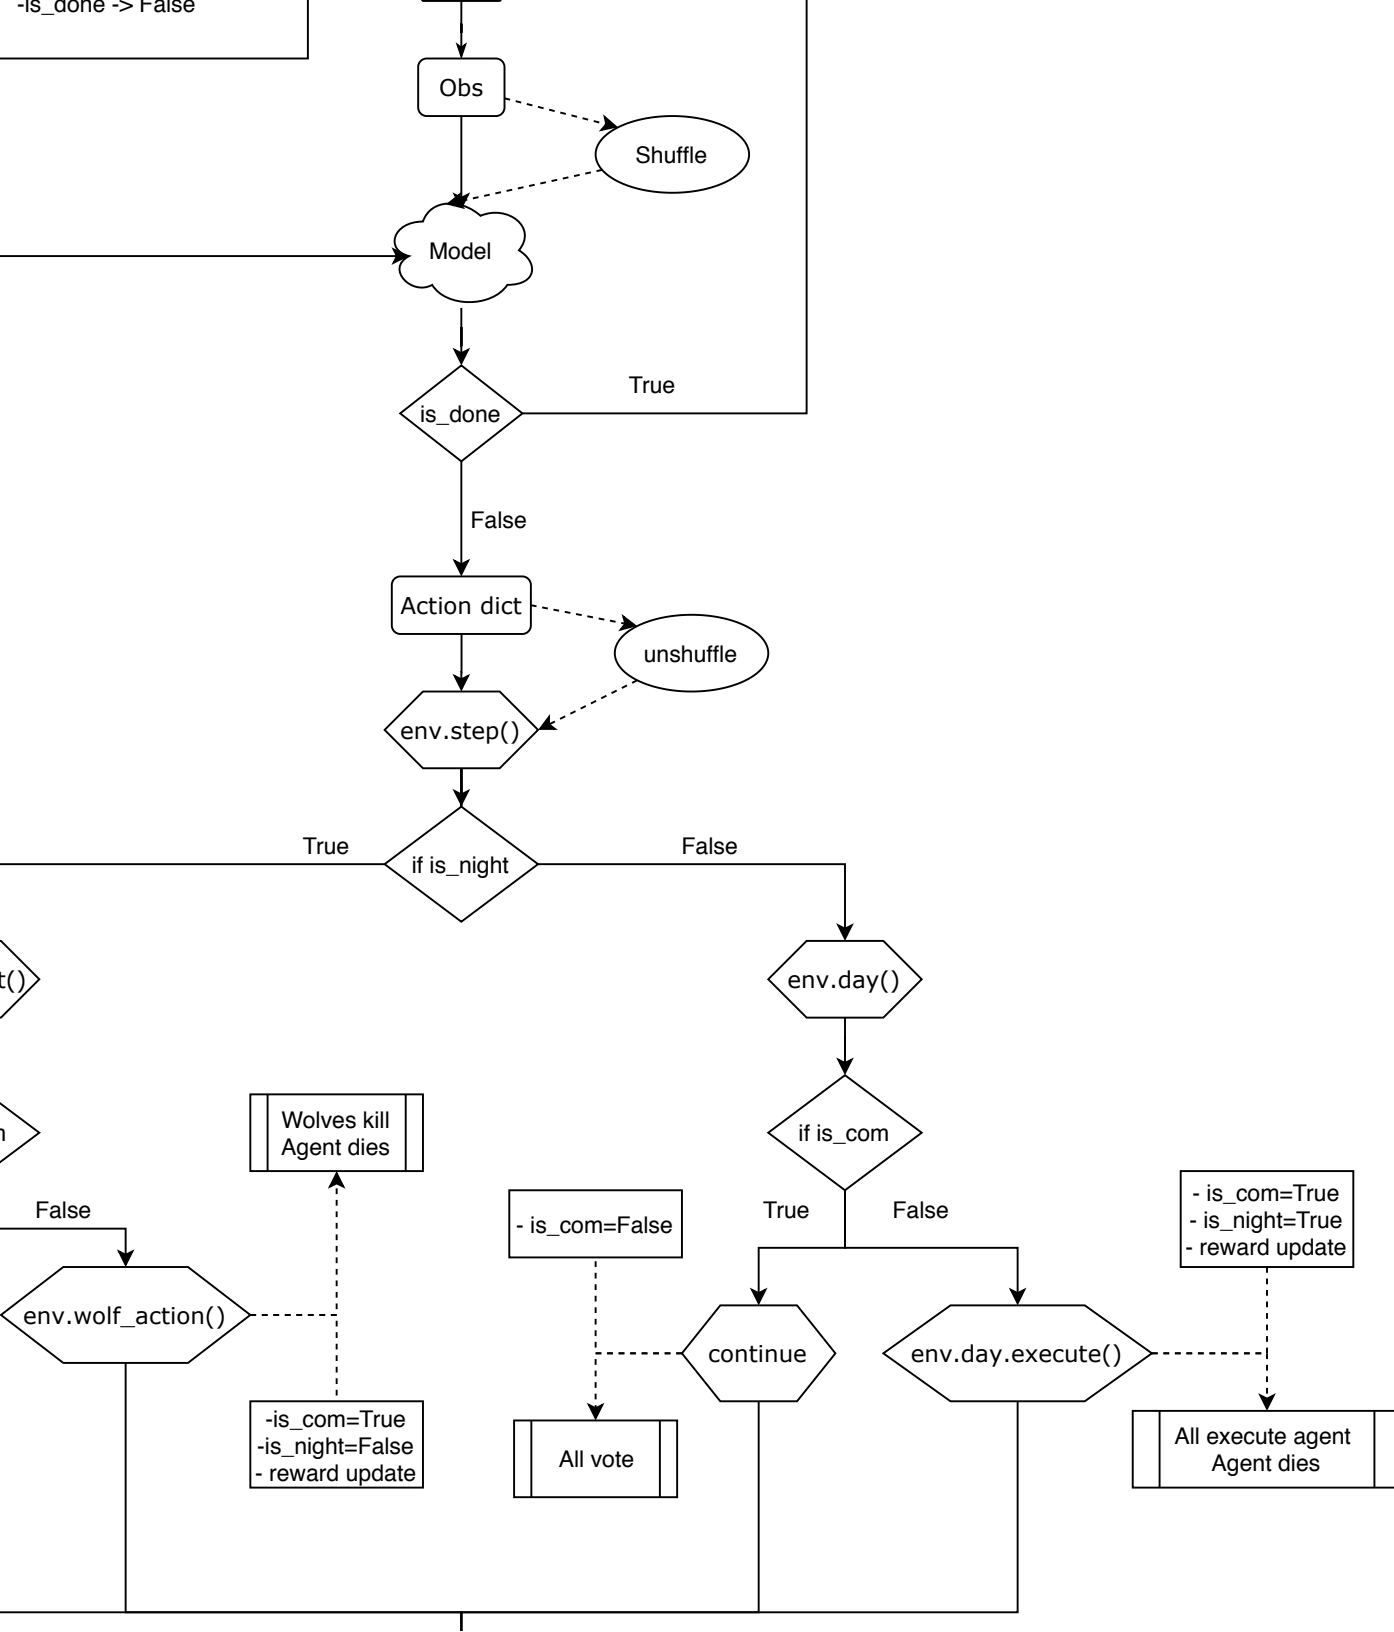

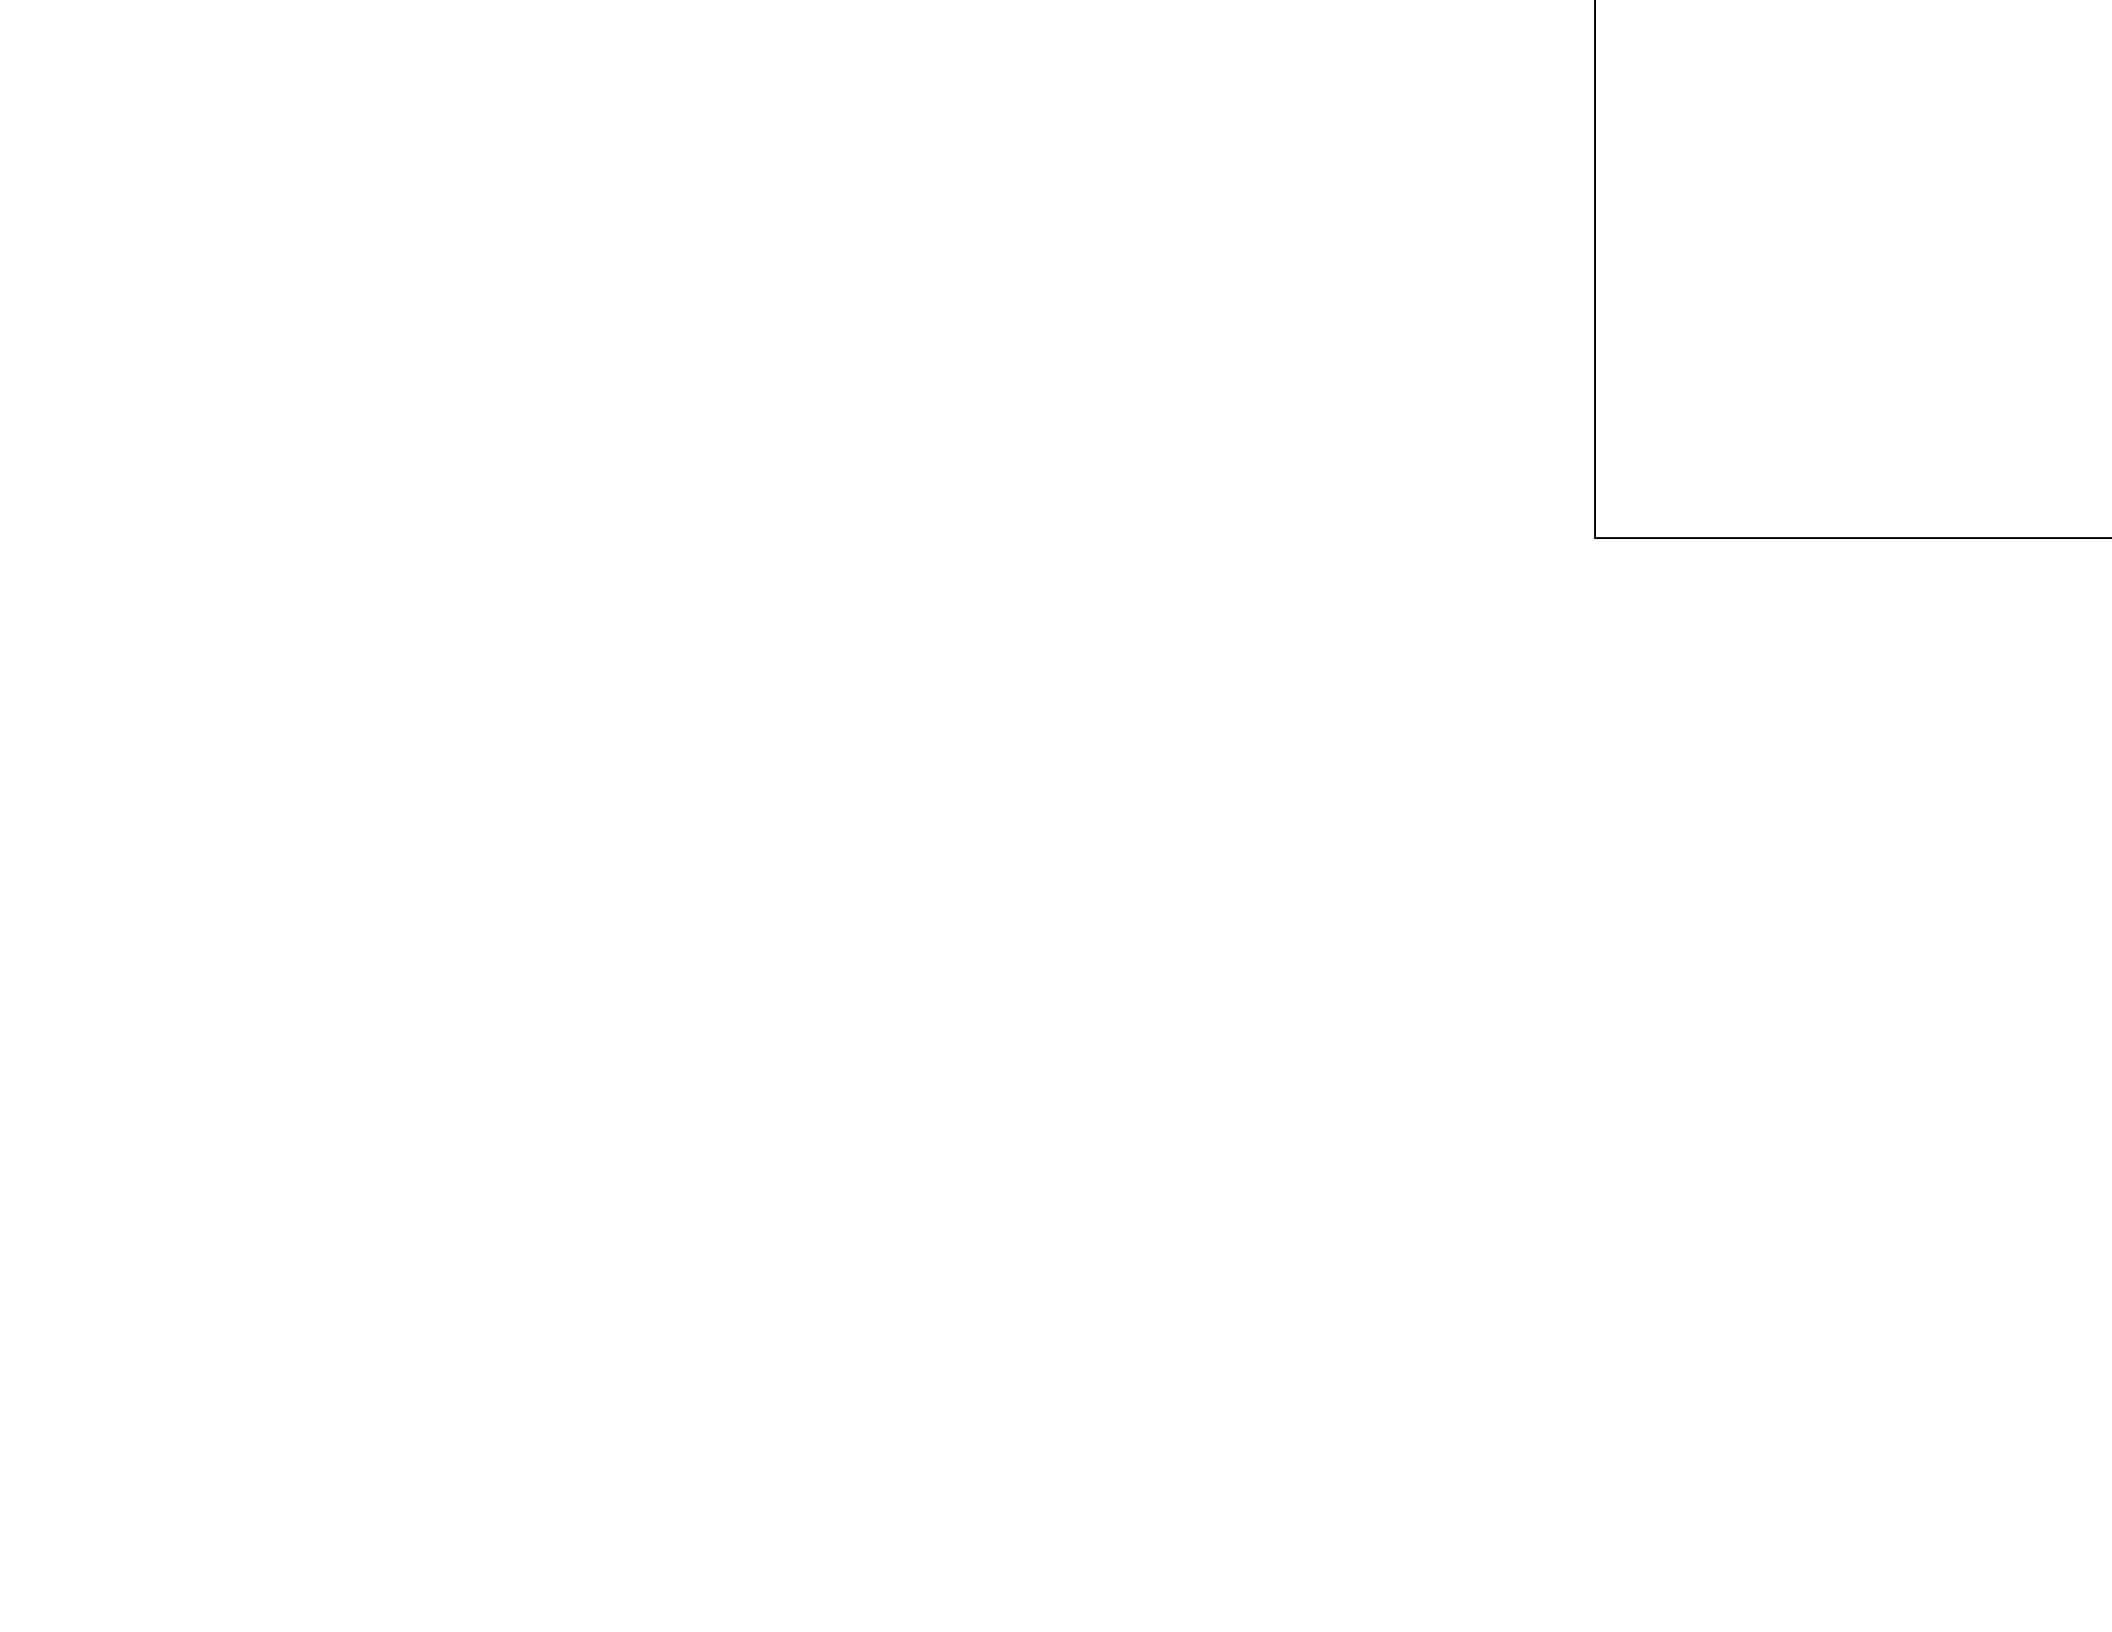

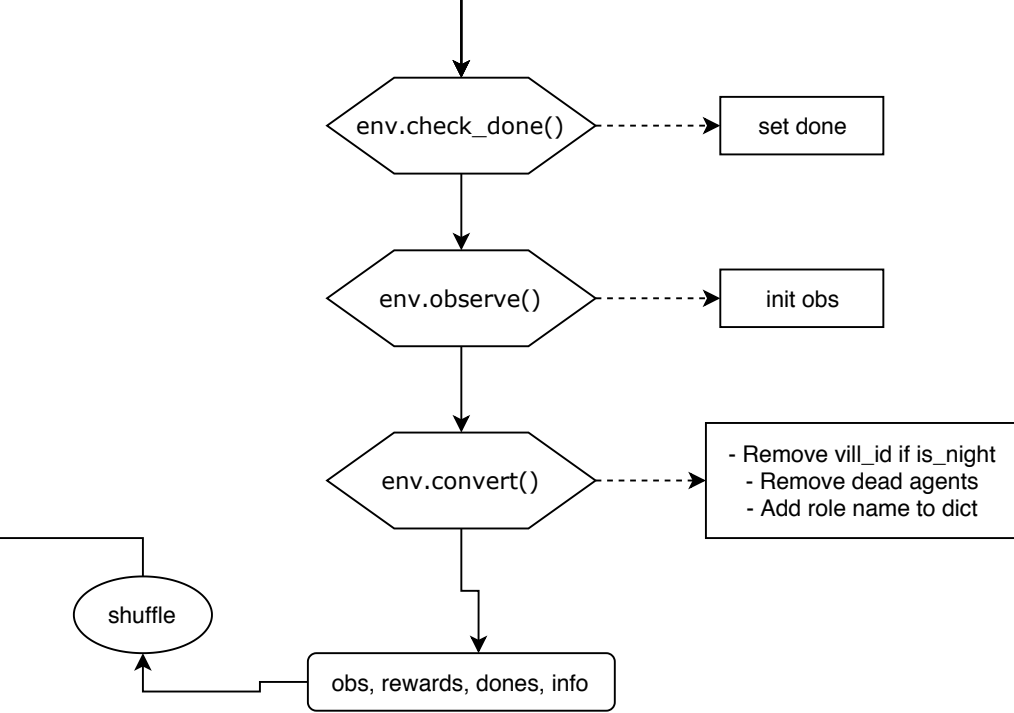

Supplement: supplementary_material [file attachment]

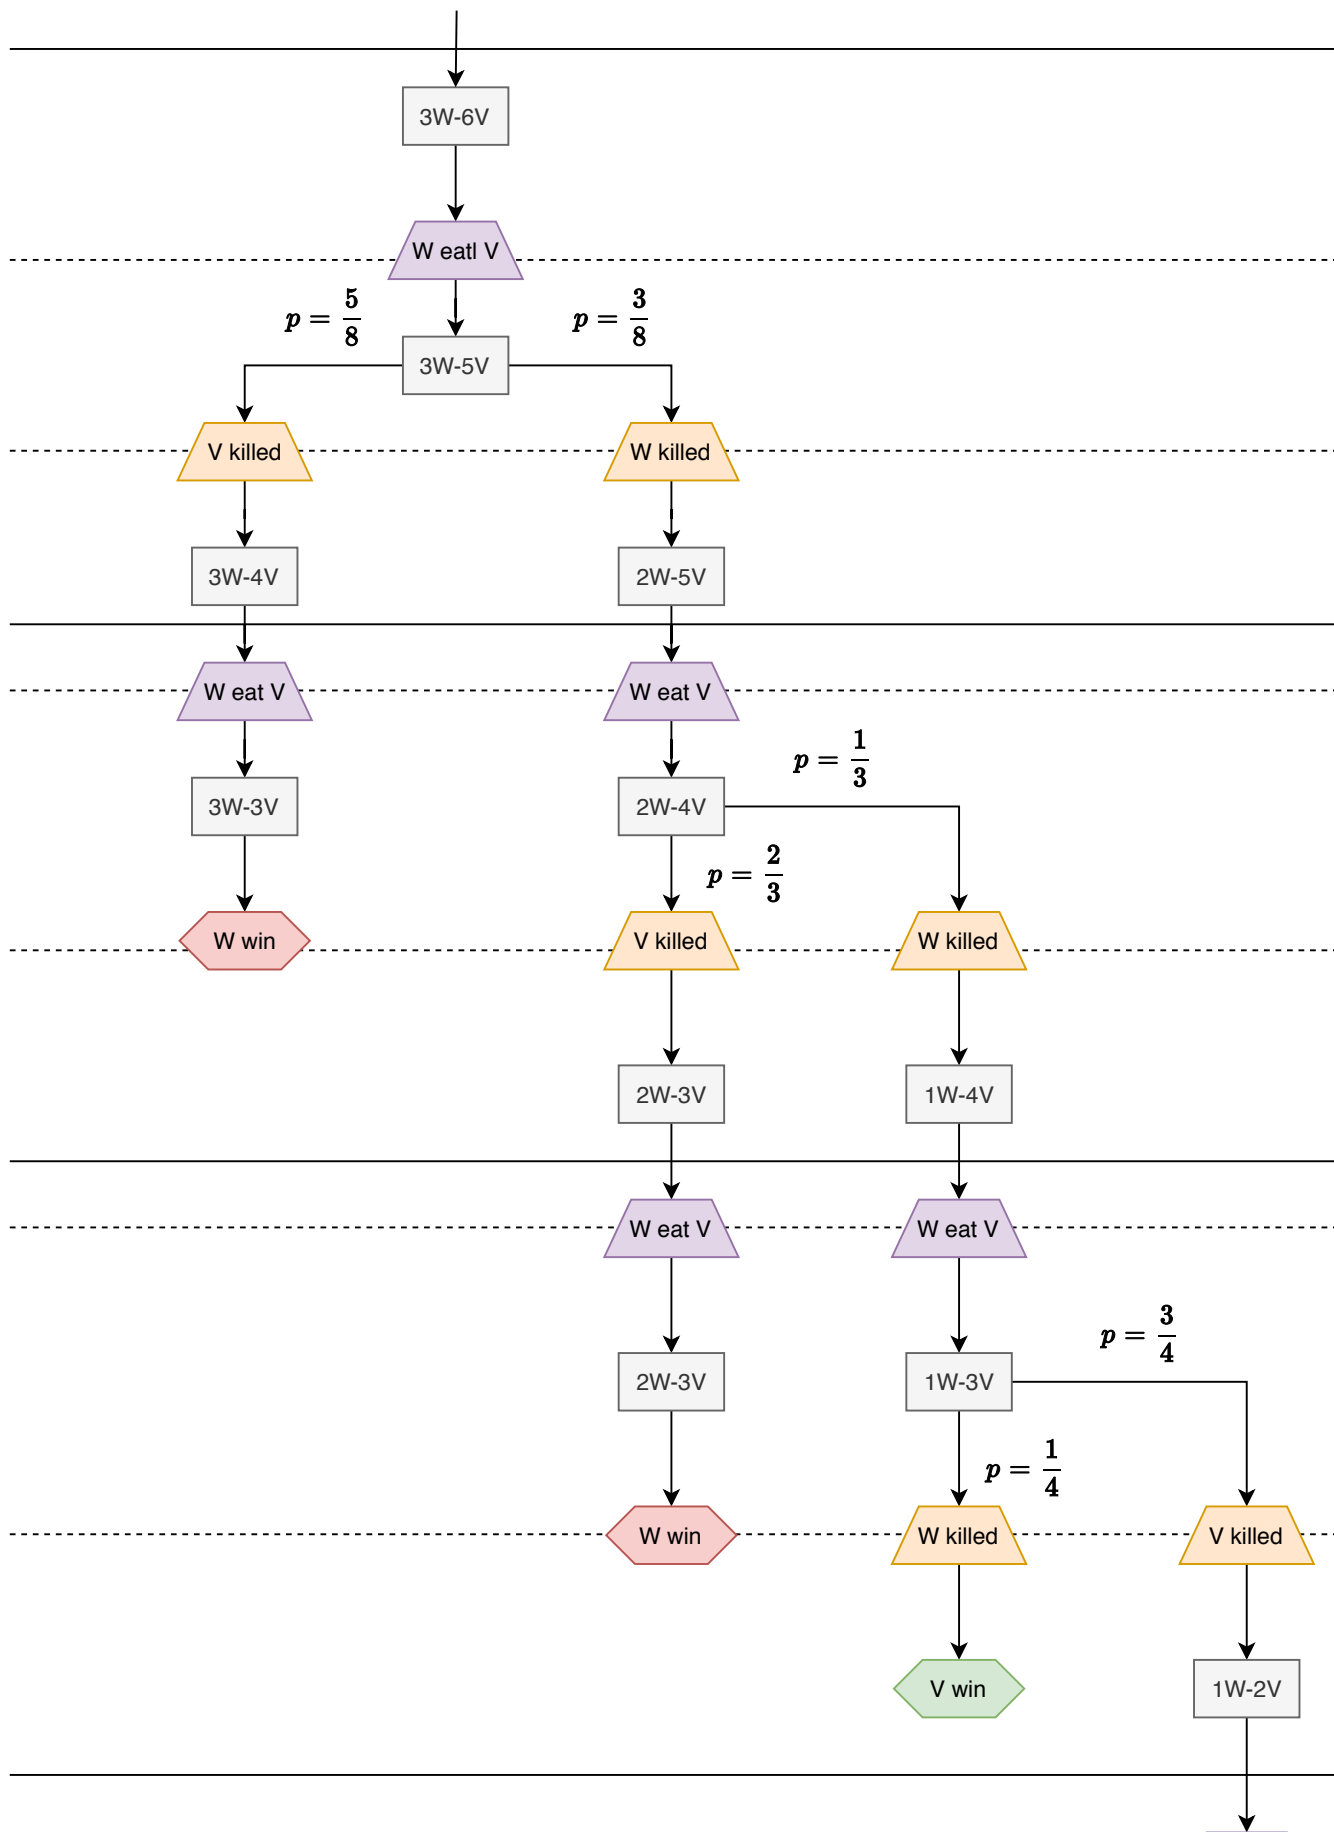

# Day 0

---

phase 1

---

phase 2

---

# Day 1

---

phase 1

---

phase 2

---

# Day 2

---

phase 1

---

phase 2

---

# Day 3

---

phase 1

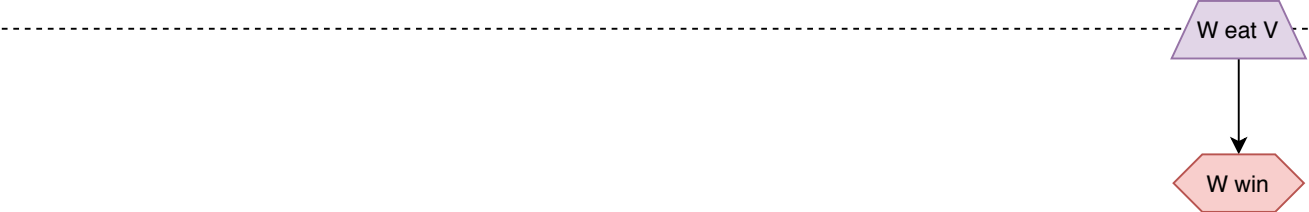

Supplement: supplementary_material [file attachment]
